# Supplementary material for: Effect of Cross-Joints Fin on the Thrust Performance of Bionic Pectoral Fins
Source: MDPI journal article supplement (doi:10.3390/jmse10070869), 2022-06-24
Supplement: s1 [file s1]

## Supplementary Material

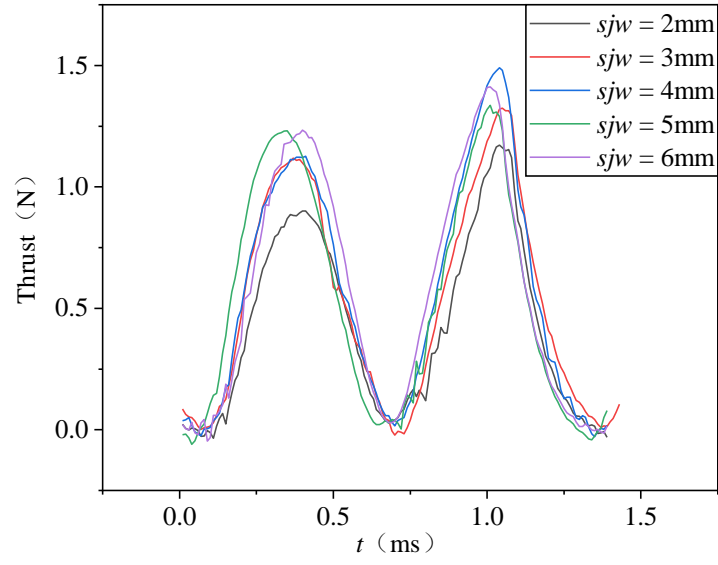

**Figure S1.** The example thrust from ATI sensor ( $t_{in} = 1.5\text{ mm}$ ,  $A_0 = 70^\circ$ ,  $f = 0.8\text{ Hz}$ ,  $c_{jw} = 6\text{ mm}$ ).
